# Supplementary material for: Dynamics of Actin Waves on Patterned Substrates: A Quantitative Analysis of Circular Dorsal Ruffles
Source: PubMed Central journal article supplement (PMC4289068; doi:10.1371/journal.pone.0115857), 2015-01-09

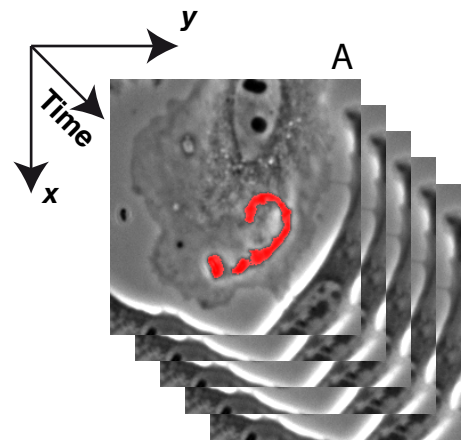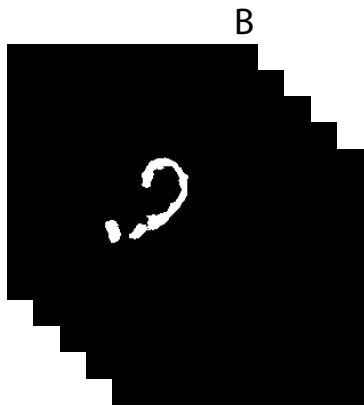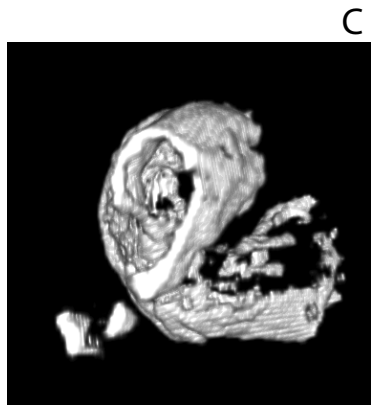

Supplement: pone.0115857.s004.pdf [file pone.0115857.s004.pdf]
