# Supplementary material for: Dynamics of Actin Waves on Patterned Substrates: A Quantitative Analysis of Circular Dorsal Ruffles
Source: PubMed Central journal article supplement (PMC4289068; doi:10.1371/journal.pone.0115857), 2015-01-09

+ PDGF

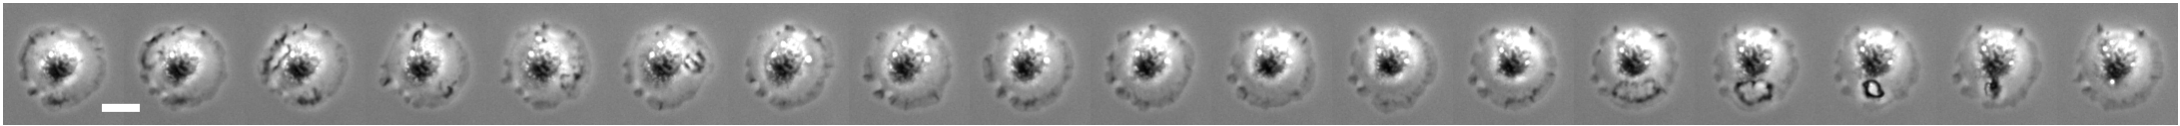

0 min      1.8 min      3.6 min      5.4 min      7.2 min      9.0 min      10.8 min      12.6 min      14.4 min

+ FBS

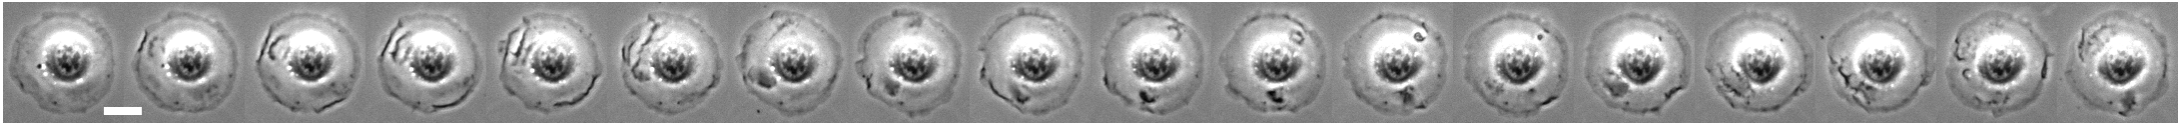

Supplement: pone.0115857.s005.pdf [file pone.0115857.s005.pdf]
